# Supplementary material for: Higher Short-Chain Fermentable Carbohydrates Are Associated with Lower Body Fat and Higher Insulin Sensitivity in People with Prediabetes
Source: MDPI journal article supplement (doi:10.3390/nu15245070), 2023-12-11
Supplement: s1 [file s1]

**Supplementary Table S1.** Spearman correlation coefficients of macronutrients and anthropometrics, biochemical profiles and insulin secretion/resistance indices.

| Correlation coefficient | Total calories (kcal/d)              | Carbohydrate s, g/day                | Protein, g/day                       | Fat, g/day                           | Sugar, g/day        | Fiber, g/day                         | Vigorous, MET-min/week | Moderate, MET-min/week              | Light, MET-min/week | Total PA min/week                   | Sedentary, min/day                   |
|-------------------------|--------------------------------------|--------------------------------------|--------------------------------------|--------------------------------------|---------------------|--------------------------------------|------------------------|-------------------------------------|---------------------|-------------------------------------|--------------------------------------|
| Age, years              | r = -0.111, p=0.146                  | r = -0.057, p=0.456                  | r = -0.079, p=0.294                  | r = <b>-0.182</b> , p= <b>0.016</b>  | r = -0.035, p=0.648 | r = 0.142, p=0.061                   | r = -0.002, p=0.978    | r = <b>0.171</b> , p= <b>0.024</b>  | r = 0.081, p=0.299  | r = 0.113, p=0.136                  | r = <b>-0.389</b> , p< <b>0.0001</b> |
| Sex                     | r = <b>-0.407</b> , p< <b>0.0001</b> | r = <b>-0.295</b> , p< <b>0.0001</b> | r = <b>-0.425</b> , p< <b>0.0001</b> | r = <b>-0.305</b> , p< <b>0.0001</b> | r = -0.132, p=0.080 | r = 0.090, p=0.233                   | r = 0.072, p=0.345     | r = 0.005, p=0.950                  | r = 0.057, p=0.466  | r = 0.017, p=0.821                  | r = -0.055, p=0.491                  |
| Weight, kg              | r = <b>0.287</b> , p< <b>0.0001</b>  | r = <b>0.263</b> , p< <b>0.0001</b>  | r = <b>0.184</b> , p= <b>0.015</b>   | r = <b>0.208</b> , p= <b>0.005</b>   | r = 0.083, p=0.272  | r = <b>-0.298</b> , p= <b>0.001</b>  | r = -0.024, p=0.752    | r = <b>-0.153</b> , p= <b>0.043</b> | r = -0.050, p=0.519 | r = -0.136, p=0.073                 | r = <b>0.203</b> , p= <b>0.010</b>   |
| Waist circumference, cm | r = 0.123, p=0.104                   | r = 0.125, p=0.099                   | r = 0.023, p=0.765                   | r = 0.092, p=0.225                   | r = -0.074, p=0.328 | r = <b>-0.334</b> , p< <b>0.0001</b> | r = -0.032, p=0.676    | r = <b>-0.192</b> , p= <b>0.011</b> | r = -0.057, p=0.462 | r = <b>-0.176</b> , p= <b>0.019</b> | r = 0.134, p=0.092                   |
| Hip circumference, cm   | r = 0.065, p=0.394                   | r = 0.130, p=0.085                   | r = -0.050, p=0.508                  | r = 0.018, p=0.815                   | r = 0.048, p=0.531  | r = <b>-0.335</b> , p< <b>0.0001</b> | r = -0.059, p=0.441    | r = <b>-0.177</b> , p= <b>0.020</b> | r = -0.070, p=0.368 | r = <b>-0.185</b> , p= <b>0.014</b> | r = 0.114, p=0.151                   |
| BMI, kg/m <sup>2</sup>  | r = 0.033, p=0.668                   | r = 0.069, p=0.366                   | r = -0.044, p=0.558                  | r = -0.011, p=0.881                  | r = -0.014, p=0.851 | r = <b>-0.371</b> , p< <b>0.0001</b> | r = 0.006, p=0.940     | r = -0.129, p=0.089                 | r = -0.090, p=0.251 | r = <b>-0.162</b> , p= <b>0.032</b> | r = 0.081, p=0.311                   |
| Body fat, %             | r = <b>-0.339</b> , p< <b>0.0001</b> | r = <b>-0.223</b> , p= <b>0.003</b>  | r = <b>-0.405</b> , p< <b>0.0001</b> | r = <b>-0.252</b> , p= <b>0.001</b>  | r = -0.182, p=0.017 | r = <b>-0.185</b> , p= <b>0.015</b>  | r = -0.019, p=0.806    | r = -0.091, p=0.240                 | r = -0.053, p=0.502 | r = -0.134, p=0.079                 | r = 0.010, p=0.906                   |
| Fasting glucose, mmol/L | r = 0.123, p=0.105                   | r = 0.042, p=0.578                   | r = 0.138, p=0.069                   | r = 0.103, p=0.173                   | r = -0.038, p=0.613 | r = -0.018, p=0.810                  | r = -0.025, p=0.739    | r = -0.165, p=0.029                 | r = -0.083, p=0.286 | r = -0.089, p=0.243                 | r = -0.097, p=0.223                  |
| 1hr PG, mmol/L          | r = 0.032, p=0.673                   | r = -0.023, p=0.765                  | r = 0.076, p=0.321                   | r = 0.052, p=0.497                   | r = -0.062, p=0.416 | r = -0.086, p=0.262                  | r = -0.058, p=0.450    | r = -0.154, p=0.044                 | r = -0.130, p=0.097 | r = -0.121, p=0.111                 | r = 0.064, p=0.427                   |
| 2hr PG, mmol/L          | r = 0.020, p=0.791                   | r = 0.026, p=0.733                   | r = -0.026, p=0.731                  | r = 0.000, p=0.999                   | r = -0.016, p=0.836 | r = -0.049, p=0.520                  | r = -0.147, p=0.053    | r = -0.135, p=0.076                 | r = 0.046, p=0.559  | r = -0.132, p=0.181                 | r = 0.088, p=0.269                   |

|                                        |                     |                     |                     |                     |                            |                                |                            |                            |                     |                            |                            |
|----------------------------------------|---------------------|---------------------|---------------------|---------------------|----------------------------|--------------------------------|----------------------------|----------------------------|---------------------|----------------------------|----------------------------|
| Fasting C-peptide, pmol/L              | r =0.077, p=0.313   | r =0.072, p=0.346   | r =0.036, p=0.642   | r =0.083, p=0.277   | r = -0.124, p=0.102        | <b>r = -0.307, p&lt;0.0001</b> | r = -0.144, p=0.058        | <b>r = -0.235, p=0.002</b> | r = -0.030, p=0.706 | <b>r = -0.194, p=0.010</b> | <b>r =0.174, p=0.029</b>   |
| 2hr plasma C-peptide, pmol/L           | r = -0.081, p=0.288 | r = -0.061, p=0.426 | r = -0.077, p=0.315 | r = -0.077, p=0.310 | <b>r = -0.193, p=0.011</b> | <b>r = -0.251, p=0.001</b>     | <b>r = -0.261, p=0.001</b> | <b>r = -0.189, p=0.013</b> | r = -0.042, p=0.591 | <b>r = -0.184, p=0.015</b> | r =0.098, p=0.219          |
| HOMA2-IR                               | r =0.087, p=0.255   | r =0.082, p=0.282   | r =0.044, p=0.568   | r =0.088, p=0.247   | r = -0.119, p=0.117        | <b>r = -0.301, p&lt;0.0001</b> | <b>r = -0.152, p=0.045</b> | <b>r = -0.247, p=0.001</b> | r = -0.029, p=0.717 | <b>r = -0.200, p=0.008</b> | <b>r =0.165, p=0.038</b>   |
| HOMA2-beta                             | r =0.015, p=0.849   | r =0.056, p=0.463   | r = -0.045, p=0.556 | r =0.008, p=0.917   | r = -0.096, p=0.206        | <b>r = -0.262, p&lt;0.0001</b> | r = -0.057, p=0.453        | r = -0.113, p=0.139        | r = -0.020, p=0.799 | r = -0.112, p=0.142        | <b>r =0.217, p=0.006</b>   |
| HOMA2-S %                              | r = -0.083, p=0.276 | r = -0.101, p=0.186 | r = -0.031, p=0.684 | r = -0.067, p=0.383 | r =0.130, p=0.088          | <b>r =0.288, p&lt;0.0001</b>   | r =0.119, p=0.119          | <b>r =0.232, p=0.002</b>   | r =0.044, p=0.580   | <b>r = 0.185, p=0.014</b>  | <b>r = -0.173, p=0.030</b> |
| Early C-peptidogenic index (pmol/mmol) | r =0.022, p=0.774   | r =0.095, p=0.216   | r =0.006, p=0.942   | r =0.001, p=0.991   | r = -0.015, p=0.842        | r = -0.125, p=0.103            | r = -0.121, p=0.116        | r = -0.051, p=0.506        | r =0.041, p=0.605   | r = -0.047, p=0.540        | r =0.051, p=0.529          |
| Late C-peptidogenic index (pmol/mmol)  | r = -0.070, p=0.357 | r = -0.017, p=0.828 | r = -0.058, p=0.445 | r = -0.104, p=0.172 | r = -0.048, p=0.528        | r = -0.065, p=0.397            | r = -0.065, p=0.396        | r = -0.127, p=0.097        | r = -0.072, p=0.358 | r = -0.107, p=0.163        | r =0.033, p=0.679          |

Spearman correlation was used in this analysis, and bolded was significant (p<0.05). Abbreviations: PG=plasma glucose; CP= C-peptide  
HOMA=Homeostasis model assessment for insulin resistance (HOMA-IR) and beta cell function (HOMA-beta) derived from fasting PG and CP.

**Supplementary Table S2.** Pearson correlation coefficients of individual and total FODMAPs and anthropometrics

| Correlation coefficient | Dietary glucose                    | Dietary fructose               | Excess Fructose                | Lactose                        | Sorbitol               | Mannitol                       | Fructans                       | GOS                            | Total FODMAPs                  |
|-------------------------|------------------------------------|--------------------------------|--------------------------------|--------------------------------|------------------------|--------------------------------|--------------------------------|--------------------------------|--------------------------------|
| Age, years              | r =0.111,<br>p=0.142               | r =0.104,<br>p=0.168           | r =0.030,<br>p=0.694           | r = -0.096,<br>p=0.206         | r = -0.036,<br>p=0.635 | r = 0.006,<br>p=0.941          | r = -0.012,<br>p=0.876         | r = 0.031,<br>p=0.679          | r = -0.071,<br>p=0.349         |
| Sex                     | r =0.014,<br>p=0.858               | r = -0.004,<br>p=0.954         | r = -0.049,<br>p=0.515         | r = -0.138,<br>p=0.067         | r =0.026,<br>p=0.730   | r =0.138,<br>p=0.069           | r = -0.078,<br>p=0.301         | r =0.042,<br>p=0.576           | r = -0.111,<br>p=0.142         |
| Weight, kg              | <b>r = -0.224,<br/>p=0.003</b>     | <b>r = -0.194,<br/>p=0.010</b> | r = -0.096,<br>p=0.203         | r =0.039,<br>p=0.607           | r = -0.066,<br>p=0.387 | <b>r = -0.209,<br/>p=0.005</b> | r = -0.060,<br>p=0.428         | r = -0.138,<br>p=0.067         | r =0.054,<br>p=0.479           |
| Waist circumference, cm | <b>r = -0.265,<br/>p&lt;0.0001</b> | <b>r = -0.246,<br/>p=0.001</b> | <b>r = -0.176,<br/>p=0.020</b> | r = -0.053,<br>p=0.482         | r = -0.129,<br>p=0.088 | <b>r = -0.230,<br/>p=0.002</b> | <b>r = -0.168,<br/>p=0.026</b> | <b>r = -0.201,<br/>p=0.007</b> | <b>r = -0.188,<br/>p=0.013</b> |
| Hip circumference, cm   | <b>r = -0.230,<br/>p=0.002</b>     | <b>r = -0.217,<br/>p=0.004</b> | <b>r = -0.191,<br/>p=0.011</b> | r = -0.073,<br>p=0.337         | r = -0.111,<br>p=0.141 | <b>r = -0.211,<br/>p=0.005</b> | r = -0.106,<br>p=0.163         | <b>r = -0.156,<br/>p=0.038</b> | <b>r = -0.174,<br/>p=0.021</b> |
| BMI, kg/m <sup>2</sup>  | <b>r = -0.257,<br/>p=0.001</b>     | <b>r = -0.242,<br/>p=0.001</b> | <b>r = -0.178,<br/>p=0.018</b> | r = -0.068,<br>p=0.372         | r = -0.053,<br>p=0.486 | <b>r = -0.240,<br/>p=0.001</b> | r = -0.108,<br>p=0.155         | <b>r = -0.198,<br/>p=0.008</b> | <b>r = -0.169,<br/>p=0.025</b> |
| Body fat, %             | <b>r = -0.212<br/>p=0.005</b>      | <b>r = -0.226,<br/>p=0.003</b> | <b>r = -0.204,<br/>p=0.007</b> | <b>r = -0.157,<br/>p=0.040</b> | r = -0.035,<br>p=0.646 | r = -0.076,<br>p=0.323         | r = -0.143,<br>p=0.061         | <b>r = -0.162,<br/>p=0.033</b> | <b>r = -0.229,<br/>p=0.003</b> |

Pearson correlation was used in this analysis, and bolded was significant (p<0.05) Abbreviations: BMI body mass index

**Supplementary Table S3.** Pearson correlation coefficients of individual and total FODMAPs and glucose, insulin secretion and sensitivity indices

| Correlation coefficient                | Dietary glucose            | Dietary fructose           | Excess Fructose     | Lactose             | Sorbitol            | Mannitol                   | Fructans            | GOS                        | Total FODMAPs       |
|----------------------------------------|----------------------------|----------------------------|---------------------|---------------------|---------------------|----------------------------|---------------------|----------------------------|---------------------|
| Fasting glucose, mmol/L                | r = -0.022, p=0.775        | r = -0.038, p=0.614        | r = -0.060, p=0.426 | r =0.018, p=0.812   | r =0.031, p=0.684   | r =0.041, p=0.586          | r = -0.003, p=0.971 | r =0.061, p=0.420          | r =0.019, p=0.804   |
| 1hr PG, mmol/L                         | r = -0.027, p=0.723        | r = -0.038, p=0.618        | r = -0.010, p=0.900 | r =0.126, p=0.099   | r = -0.001, p=0.995 | r = 0.036, p=0.637         | r = -0.074, p=0.333 | r = -0.045, p=0.557        | r =0.066, p=0.384   |
| 2hr PG, mmol/L                         | r = -0.036, p=0.636        | r = -0.058, p=0.445        | r = 0.016, p=0.830  | r = 0.023, p=0.763  | r =0.047, p=0.534   | r = 0.050, p=0.509         | r =0.040, p=0.596   | r = -0.026, p=0.736        | r = 0.042, p=0.581  |
| Fasting C-peptide, pmol/L              | <b>r = -0.187, p=0.013</b> | <b>r = -0.164, p=0.031</b> | r =-0.056, p=0.461  | r =-0.035, p=0.648  | r = 0.001, p=0.985  | <b>r = -0.169, p=0.026</b> | r = -0.070, p=0.361 | <b>r = -0.197, p=0.009</b> | r = -0.098, p=0.200 |
| 2hr plasma C-peptide, pmol/L           | r = -0.112, p=0.140        | r = -0.075, p=0.324        | r =0.043, p=0.571   | r = -0.040, p=0.602 | r = 0.032, p=0.670  | r = -0.100, p=0.191        | r = -0.048, p=0.527 | <b>r = -0.203, p=0.007</b> | r = -0.067, p=0.379 |
| HOMA2-IR                               | <b>r = -0.187, p=0.013</b> | <b>r = -0.165, p=0.029</b> | r = -0.059, p=0.441 | r = -0.035, p=0.649 | r = 0.005, p=0.948  | <b>r = -0.164, p=0.030</b> | r = -0.071, p=0.350 | <b>r = -0.192, p=0.011</b> | r = -0.097, p=0.203 |
| HOMA2-beta                             | r = -0.037, p=0.628        | r = -0.087, p=0.256        | r = -0.055, p=0.469 | r = -0.048, p=0.529 | r = -0.040, p=0.599 | <b>r = -0.197, p=0.009</b> | r = -0.070, p=0.357 | <b>r = -0.228, p=0.002</b> | r = -0.120, p=0.114 |
| HOMA2-S, %                             | r =0.138, p=0.070          | r =0.148, p=0.052          | r =0.102, p=0.180   | r =0.005, p=0.946   | r =0.014, p=0.850   | <b>r =0.174, p=0.022</b>   | r =0.069, p=0.365   | <b>r =0.251, p=0.001</b>   | r =0.092, p=0.229   |
| Early C-peptidogenic index (pmol/mmol) | r =0.027, p=0.727          | r =0.039, p=0.611          | r =0.067, p=0.382   | r = -0.022, p=0.772 | r =0.081, p=0.292   | r = -0.145, p=0.058        | r = 0.092, p=0.232  | r = -0.085, p=0.270        | r = 0.010, p=0.897  |
| Late C-peptidogenic index (pmol/mmol)  | r =0.025, p=0.745          | r =0.036, p=0.639          | r =0.084, p=0.270   | r =0.010, p=0.895   | r =0.058, p=0.450   | r = 0.101, p=0.186         | r = -0.013, p=0.867 | r =0.036, p=0.637          | r = 0.040, p=0.598  |

Pearson correlation was used in this analysis, and bolded was significant (p<0.05). Abbreviations: PG=plasma glucose; CP= C-peptide  
HOMA=Homeostasis model assessment for insulin resistance (HOMA-IR) and beta cell function (HOMA-beta) derived from fasting PG and CP.
